# Supplementary material for: Bisphenol A Exposure and Sperm ACHE Hydroxymethylation in Men
Source: MDPI journal article supplement (doi:10.3390/ijerph16010152), 2019-01-08
Supplement: s1 [file s1]

Supplemental tables

**Table S1.** The differences of pre-shift and post-shift BPA levels in BPA-exposed group.

|            | N  | Detection rate% | Median | Minimum | Maximum   | Percentiles |          | <i>t</i> | <i>p</i> |
|------------|----|-----------------|--------|---------|-----------|-------------|----------|----------|----------|
|            |    |                 |        |         |           | 5th         | 95th     |          |          |
| Pre-shift  | 74 | 96.3            | 89.96  | LOD     | 217060.90 | 0.57        | 12862.53 |          |          |
| Post-shift | 74 | 100             | 180.59 | 0.75    | 264219.40 | 1.45        | 23979.51 | 3.62     | 0.001    |

**Table S2.** The difference of urine BPA in men with different education category.

| (I) edu        | (J) edu        | Mean Difference (I-J) | Standard Error | <i>p</i> |
|----------------|----------------|-----------------------|----------------|----------|
| ≤Middle school | High school    | 1.56*                 | 0.66           | 0.019    |
|                | ≥College       | 2.63*                 | 0.83           | 0.002    |
| High school    | ≤Middle school | -1.56*                | 0.66           | 0.019    |
|                | ≥College       | 1.07                  | 0.73           | 0.146    |
| ≥College       | ≤Middle school | -2.63*                | 0.83           | 0.002    |
|                | High school    | -1.07                 | 0.73           | 0.146    |

\* $\alpha=0.05$ .
